# Supplementary material for: meso-Dichloropyrimidinyl substituted expanded porphyrins
Source: Royal Society of Chemistry journal article supplement (doi:10.1039/b501089f), 2005-01-01
Supplement: b501089f.pdf [file b501089f.pdf]

## Electronic supplementary information (ESI)

### *meso*-Dichloropyrimidinyl substituted expanded porphyrins

Wouter Maes, Jeroen Vanderhaeghen and Wim Dehaen\*

*Department of Chemistry, Katholieke Universiteit Leuven, Celestijnenlaan 200F, 3001*

*Leuven, Belgium*

*E-mail: wim.dehaen@chem.kuleuven.ac.be*

## 1. Experimental procedures and data

### \* Expanded porphyrins 1-3

Cfr. J.-Y. Shin, H. Furuta, K. Yoza, S. Igarashi and A. Osuka, *J. Am. Chem. Soc.*, 2001, **123**, 7190-7191; J.-Y. Shin, H. Furuta and A. Osuka, *Angew. Chem. Int. Ed.*, 2001, **40**, 619-621.

The reaction mixture was separated by column chromatography (silica, eluent CH<sub>2</sub>Cl<sub>2</sub>-petroleum ether 1-1 → CH<sub>2</sub>Cl<sub>2</sub>) to afford porphyrin **1** (purple solid, 10 %), pentaphyrin **2** (brown-black solid, 11 %) and hexaphyrin **3** (gold-coloured solid, 11 %) and a mixture of the higher homologues.

#### - Porphyrin 1

UV/VIS (DMF):  $\lambda_{\max}$  (log  $\epsilon$ ) = 281.3 (4.841), 291.8 (4.861), 424.8 (5.374), 517.4 (4.120), 546.9 (3.362), 593.0 (3.634), 655.0 (3.093).

MS (ESI):  $m/z$  = 1203.0 [M+H]<sup>+</sup>.

#### - Pentaphyrin 2

<sup>1</sup>H-NMR (300 MHz, CDCl<sub>3</sub>)  $\delta$  (ppm) = 9.08 (d, <sup>3</sup> $J$  = 5.1 Hz, 1H, H <sub>$\beta$</sub> -pyr), 8.98 (d, <sup>3</sup> $J$  = 5.1 Hz, 1H, H <sub>$\beta$</sub> -pyr), 8.80-8.30 (m, 14H), 7.75-7.50 (m, 15H), 3.51 (s, 1H), -1.87 (s, 1H); some signal assignments remain unclear due to solvent impurities and overlapping signals.

UV/VIS (CH<sub>2</sub>Cl<sub>2</sub>):  $\lambda_{\max}$  (log  $\epsilon$ ) = 278.1 (4.971), 482.0 (4.677), 533.2 (4.662), 800.0 (3.869).

MS (ESI):  $m/z$  = 1502.0 [M+H]<sup>+</sup>.

#### - Hexaphyrin 3

<sup>1</sup>H-NMR (400 MHz, CDCl<sub>3</sub>)  $\delta$  (ppm) = 9.43 (d, <sup>3</sup> $J$  = 4.8 Hz, 4H, H <sub>$\beta$</sub> -pyr), 9.14 (d, <sup>3</sup> $J$  = 4.8 Hz, 4H, H <sub>$\beta$</sub> -pyr), 8.82 (d, <sup>3</sup> $J$  = 7.2 Hz, 4H), 8.49 (d, <sup>3</sup> $J$  = 7.2 Hz, 8H), 7.70 (m, 6H), 7.54 (t, <sup>3</sup> $J$  = 7.6 Hz, 4H), 7.41 (t, <sup>3</sup> $J$  = 7.6 Hz, 8H), -2.09 (s<sub>br</sub>, 2H, NH), -2.50 (s, 4H, H <sub>$\beta$</sub> -pyr).

<sup>13</sup>C-NMR (100 MHz, CDCl<sub>3</sub>)  $\delta$  (ppm) = 166.0, 164.9, 163.8, 162.9, 155.3, 149.1, 134.9, 134.7, 134.1, 133.0, 132.9, 132.0, 131.9, 129.6, 129.4, 129.1, 128.9, 128.7, 125.1, 122.8, 113.8.

MS (ESI):  $m/z$  = 1803.8 [M+H]<sup>+</sup>.

UV/VIS (CH<sub>2</sub>Cl<sub>2</sub>):  $\lambda_{\max}$  (log  $\epsilon$ ) = 271.0 (5.039), 575.2 (5.380), 606.9 (4.961), 722.6 (4.424), 782.9 (4.009), 899.1 (3.749), 1035.1 (4.103).

Crystals could be grown from THF.

### \* Octasubstitution on porphyrin 1

Octafunctional porphyrin **1** (25 mg, 20.8  $\mu$ mol) and 4-*t*-butylphenol (38 mg, 253  $\mu$ mol) were dissolved together in DMF (5 mL). K<sub>2</sub>CO<sub>3</sub> (55 mg, 400  $\mu$ mol) was added and the mixture was heated at 70 °C during 24h. DMF was evaporated, the residue was dissolved in CH<sub>2</sub>Cl<sub>2</sub> (25 mL), washed with water (3 x 25 mL) and the organic fraction was dried over MgSO<sub>4</sub>. The octasubstituted porphyrin was, after purification by column chromatography (silica, eluent CH<sub>2</sub>Cl<sub>2</sub>-petroleumether 1-1), obtained in 64 % yield (28 mg).

<sup>1</sup>H-NMR (400 MHz, CDCl<sub>3</sub>)  $\delta$  (ppm) = 9.21 (s, 8H, H <sub>$\beta$</sub> -pyr), 8.36 (dd, <sup>3</sup> $J$  = 8.2 Hz, <sup>4</sup> $J$  = 1.6 Hz, 8H), 7.47 (m, 12H), 7.13 (d, <sup>3</sup> $J$  = 8.8 Hz, 16H), 7.02 (d, <sup>3</sup> $J$  = 8.8 Hz, 16H), 1.12 (s, 72H, *t*-Bu), -2.38 (s<sub>br</sub>, 2H, NH).

$^{13}\text{C}$ -NMR (100 MHz,  $\text{CDCl}_3$ )  $\delta$  (ppm) = 169.9, 163.2, 150.7, 147.4, 137.1, 131.1, 130.1 (br), 128.6, 128.5, 125.5, 120.9, 108.0, 106.1, 34.2, 31.3.

MS (ESI):  $m/z$  = 2113.0  $[\text{M}+\text{H}]^+$ .

UV/VIS ( $\text{CH}_2\text{Cl}_2$ ):  $\lambda_{\text{max}}$  (log  $\epsilon$ ) = 258.4 (4.864), 428.0 (5.656), 520.5 (4.376), 554.5 (3.958), 595.1 (3.871), 650.9 (3.226).

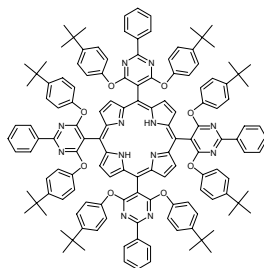

### \* Doubly N-fused hexaphyrins 6 and 7

To a solution of [26]hexaphyrin **3** (50 mg, 27.7  $\mu\text{mol}$ ) in DMF (10 mL) were added  $\text{K}_2\text{CO}_3$  (192 mg, 1.39 mmol) and 4-*t*-butylphenol (104 mg, 693  $\mu\text{mol}$ ) and the mixture was heated at 90 °C under Ar atmosphere. After 48h, DMF was evaporated and the residue was dissolved in  $\text{Et}_2\text{O}$  (25 mL) and washed with water (3 x 25 mL). The organic phase was dried over  $\text{MgSO}_4$  and evaporated to dryness. The crude product was subjected to column chromatographic purification (silica, eluent  $\text{CH}_2\text{Cl}_2$ -petroleumether 1-1) and the *syn*- and *anti*-doubly N-fused hexaphyrins **6** and **7** were obtained in 13 mg (16 %) and 39 mg (49 %) yield.

#### - *syn*-Doubly N-fused hexaphyrin 6

$^1\text{H}$ -NMR (400 MHz,  $\text{CDCl}_3$ )  $\delta$  (ppm) = ~16 ( $s_{\text{br}}$ , 2H, NH), 10.86 (d,  $^3J$  = 5.7 Hz, 2H,  $\text{H}_{\beta}$ -pyr), 9.90 (d,  $^3J$  = 5.6 Hz, 2H,  $\text{H}_{\beta}$ -pyr), 8.03 (d,  $^3J$  = 7.3 Hz, 2H, *o*-Ph), 7.97 (d,  $^3J$  = 7.5 Hz, 2H, *o*-Ph), 7.74 (d,  $^3J$  = 7.5 Hz, 4H, *o*-Ph), 7.63 (m, 4H, *o*-Ph), 7.74 (d,  $^3J$  = 8.6 Hz, 4H), 7.38-7.10 (m, 38H), 7.09 (d,  $^3J$  = 8.5 Hz, 2H), 6.87 (m, 6H, *m/p*-Ph), 6.76 (d,  $^3J$  = 8.5 Hz, 8H), 6.39 (d,  $^3J$  = 4.4 Hz, 2H,  $\text{H}_{\beta}$ -pyr), 6.28 (d,  $^3J$  = 4.3 Hz, 2H,  $\text{H}_{\beta}$ -pyr), 6.20 (d,  $^3J$  = 4.2 Hz, 2H,  $\text{H}_{\beta}$ -pyr), 5.74 (d,  $^3J$  = 4.4 Hz, 2H,  $\text{H}_{\beta}$ -pyr), 1.42 (s, 18H, *t*-Bu), 1.36 (s, 18H, *t*-Bu), 1.33 (s, 18H, *t*-Bu), 1.26 (s, 36H, *t*-Bu).

$^{13}\text{C}$ -NMR (100 MHz,  $\text{CDCl}_3$ )  $\delta$  (ppm) = 169.0, 168.7, 162.6, 161.81, 161.77, 157.7 ( $\text{C}_{\alpha}$ -pyr), 157.6, 155.0, 151.1 ( $\text{C}_{\alpha}$ -pyr), 150.9, 150.7, 150.5, 150.4, 148.1, 147.8, 147.5, 147.4, 145.9 ( $\text{C}_{\alpha}$ -pyr), 145.4 ( $\text{C}_{\alpha}$ -pyr), 144.1 ( $\text{C}_{\alpha}$ -pyr), 141.3 ( $\text{C}_{\alpha}$ -pyr), 137.0, 136.6, 136.5 ( $\text{CH}_{\beta}$ ), 136.4, 131.0 (CH), 130.4 (CH), 129.4 (CH), 128.4 ( $\text{CH}_{\beta}$ ), 128.3 (CH), 128.25 (CH), 128.20 (CH), 127.72 (CH), 127.68 (CH), 127.6 (CH), 127.5 ( $\text{CH}_{\beta}$ ), 126.3, 126.1 (CH), 125.9 (CH), 125.8 (CH), 125.7 (CH), 125.0 ( $\text{CH}_{\beta}$ ), 121.6 ( $\text{CH}_{\beta}$ ), 121.5 (CH), 121.2 (CH), 121.0 (CH), 120.6 (CH), 120.1 ( $\text{CH}_{\beta}$ ), 116.0, 113.9, 108.1, 107.8, 104.2, 100.7, 34.6, 34.5, 34.42, 34.36.

MS (ESI):  $m/z$  = 2869.9  $[\text{M}+\text{H}]^+$ , 1434.9  $[\text{M}+\text{H}]^{2+}$ .

UV/VIS ( $\text{CH}_2\text{Cl}_2$ ):  $\lambda_{\text{max}}$  (log  $\epsilon$ ) = 264.0 (5.106), 547.0 (5.058).

#### - *anti*-Doubly N-fused hexaphyrin 7

$^1\text{H}$ -NMR (400 MHz,  $\text{CDCl}_3$ )  $\delta$  (ppm) = ~16 ( $s_{\text{br}}$ , 2H, NH), 10.82 (d,  $^3J$  = 5.6 Hz, 2H,  $\text{H}_{\beta}$ -pyr), 10.37 (d,  $^3J$  = 5.6 Hz, 2H,  $\text{H}_{\beta}$ -pyr), 7.97 (d,  $^3J$  = 7.3 Hz, 4H, *o*-Ph), 7.75 (d,  $^3J$  = 7.5 Hz, 4H, *o*-Ph), 7.62 (m, 4H, *o*-Ph), 7.46-7.08 (m, 42H), 6.89 (m, 8H, *m/p*-Ph), 6.69 ( $s_{\text{br}}$ , 8H), 6.31 (d,  $^3J$  = 4.7 Hz, 2H,  $\text{H}_{\beta}$ -pyr), 6.30 (d,  $^3J$  = 4.7 Hz, 2H,  $\text{H}_{\beta}$ -pyr), 6.25 (d,  $^3J$  = 4.0 Hz, 2H,  $\text{H}_{\beta}$ -pyr), 5.70 (d,  $^3J$  = 3.8 Hz, 2H,  $\text{H}_{\beta}$ -pyr), 1.39 (s, 36H, *t*-Bu), 1.34 (s, 18H, *t*-Bu), 1.25 (s, 36H, *t*-Bu).

$^{13}\text{C}$ -NMR (100 MHz,  $\text{CDCl}_3$ )  $\delta$  (ppm) = 169.0, 168.6, 162.5, 161.9, 158.1 ( $\text{C}_{\alpha}$ -pyr), 157.6, 154.5, 151.1 ( $\text{C}_{\alpha}$ -pyr), 150.9, 150.5, 150.4, 148.6 ( $\text{C}_{\alpha}$ -pyr), 148.0, 147.6, 147.3, 147.1 ( $\text{C}_{\alpha}$ -pyr), 142.2 ( $\text{C}_{\alpha}$ -pyr), 140.1 ( $\text{C}_{\alpha}$ -pyr), 137.2, 136.6, 136.5, 136.1 ( $\text{CH}_{\beta}$ ), 131.0 (CH), 130.9 (CH), 130.4, 129.5 ( $\text{CH}_{\beta}$ ), 129.5 (CH), 128.3 (CH), 128.24 (CH), 128.18 (CH), 127.7 (CH), 127.5 (CH), 126.8 ( $\text{CH}_{\beta}$ ), 126.7, 126.1 (CH), 125.9 (CH), 125.8 ( $\text{CH}_{\beta}$ ), 125.7 (CH), 123.3 ( $\text{CH}_{\beta}$ ), 121.4 (CH), 121.0 (CH), 120.4 (CH), 119.1 ( $\text{CH}_{\beta}$ ), 114.3, 108.3, 107.6, 104.0, 100.8, 34.5, 34.4, 34.3.

MS (ESI):  $m/z$  = 2869.7  $[\text{M}+\text{H}]^+$ , 1434.0  $[\text{M}+\text{H}]^{2+}$ .

UV/VIS ( $\text{CH}_2\text{Cl}_2$ ):  $\lambda_{\text{max}}$  (log  $\epsilon$ ) = 262.2 (5.098), 544.3 (4.872).

## 2. Spectra

\* Hexaphyrin 3

- ESI-MS

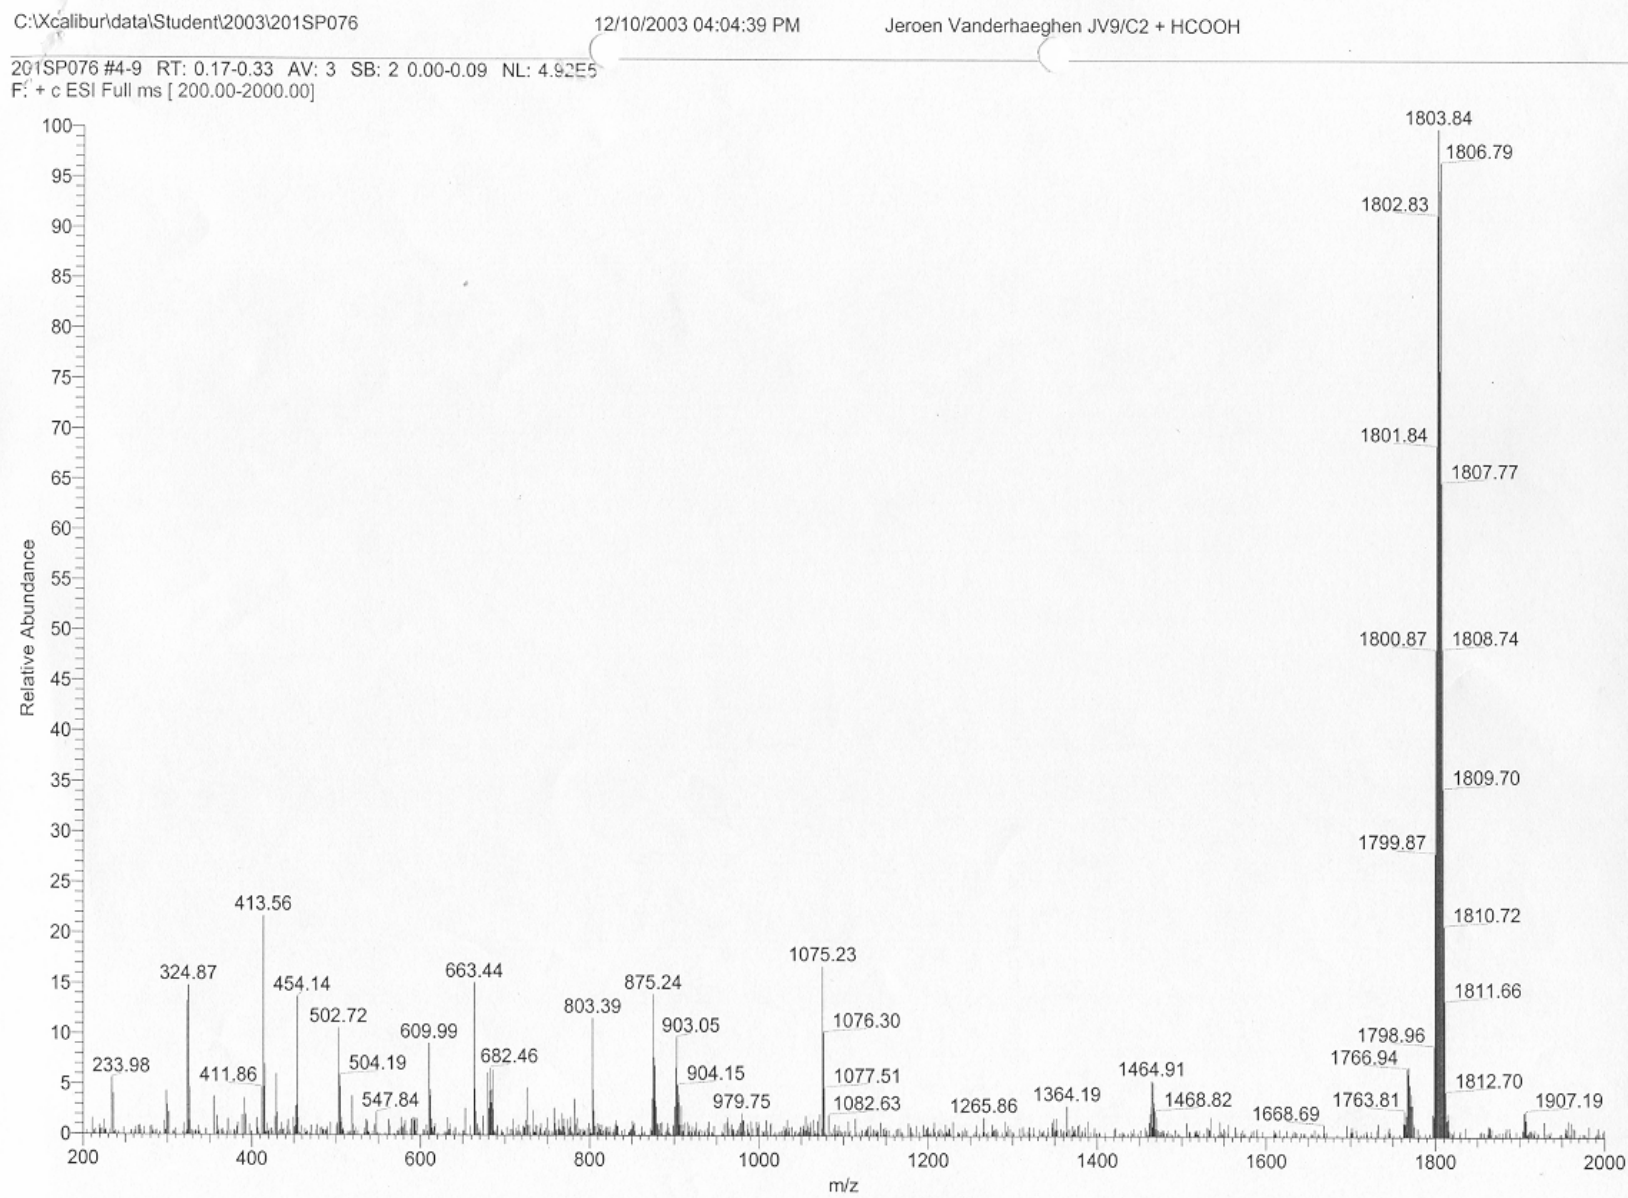

<sup>1</sup>H NMR

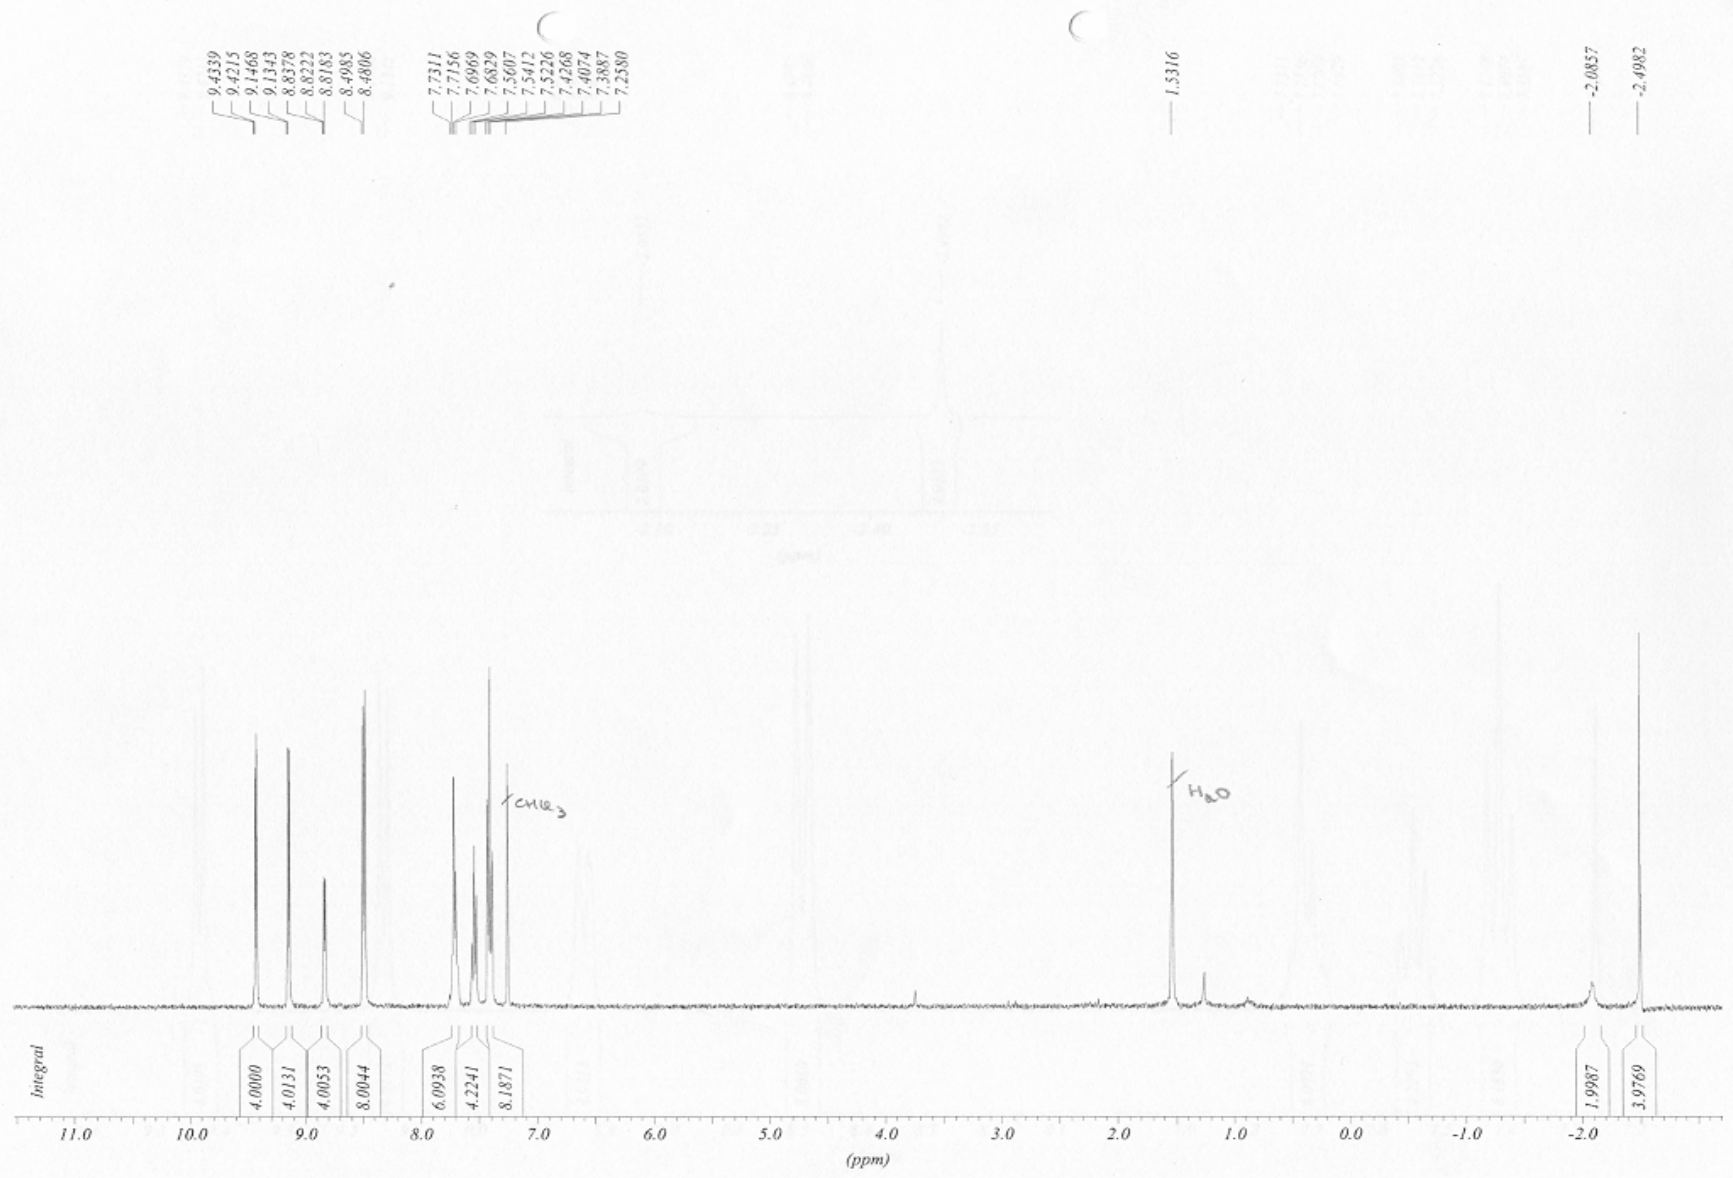

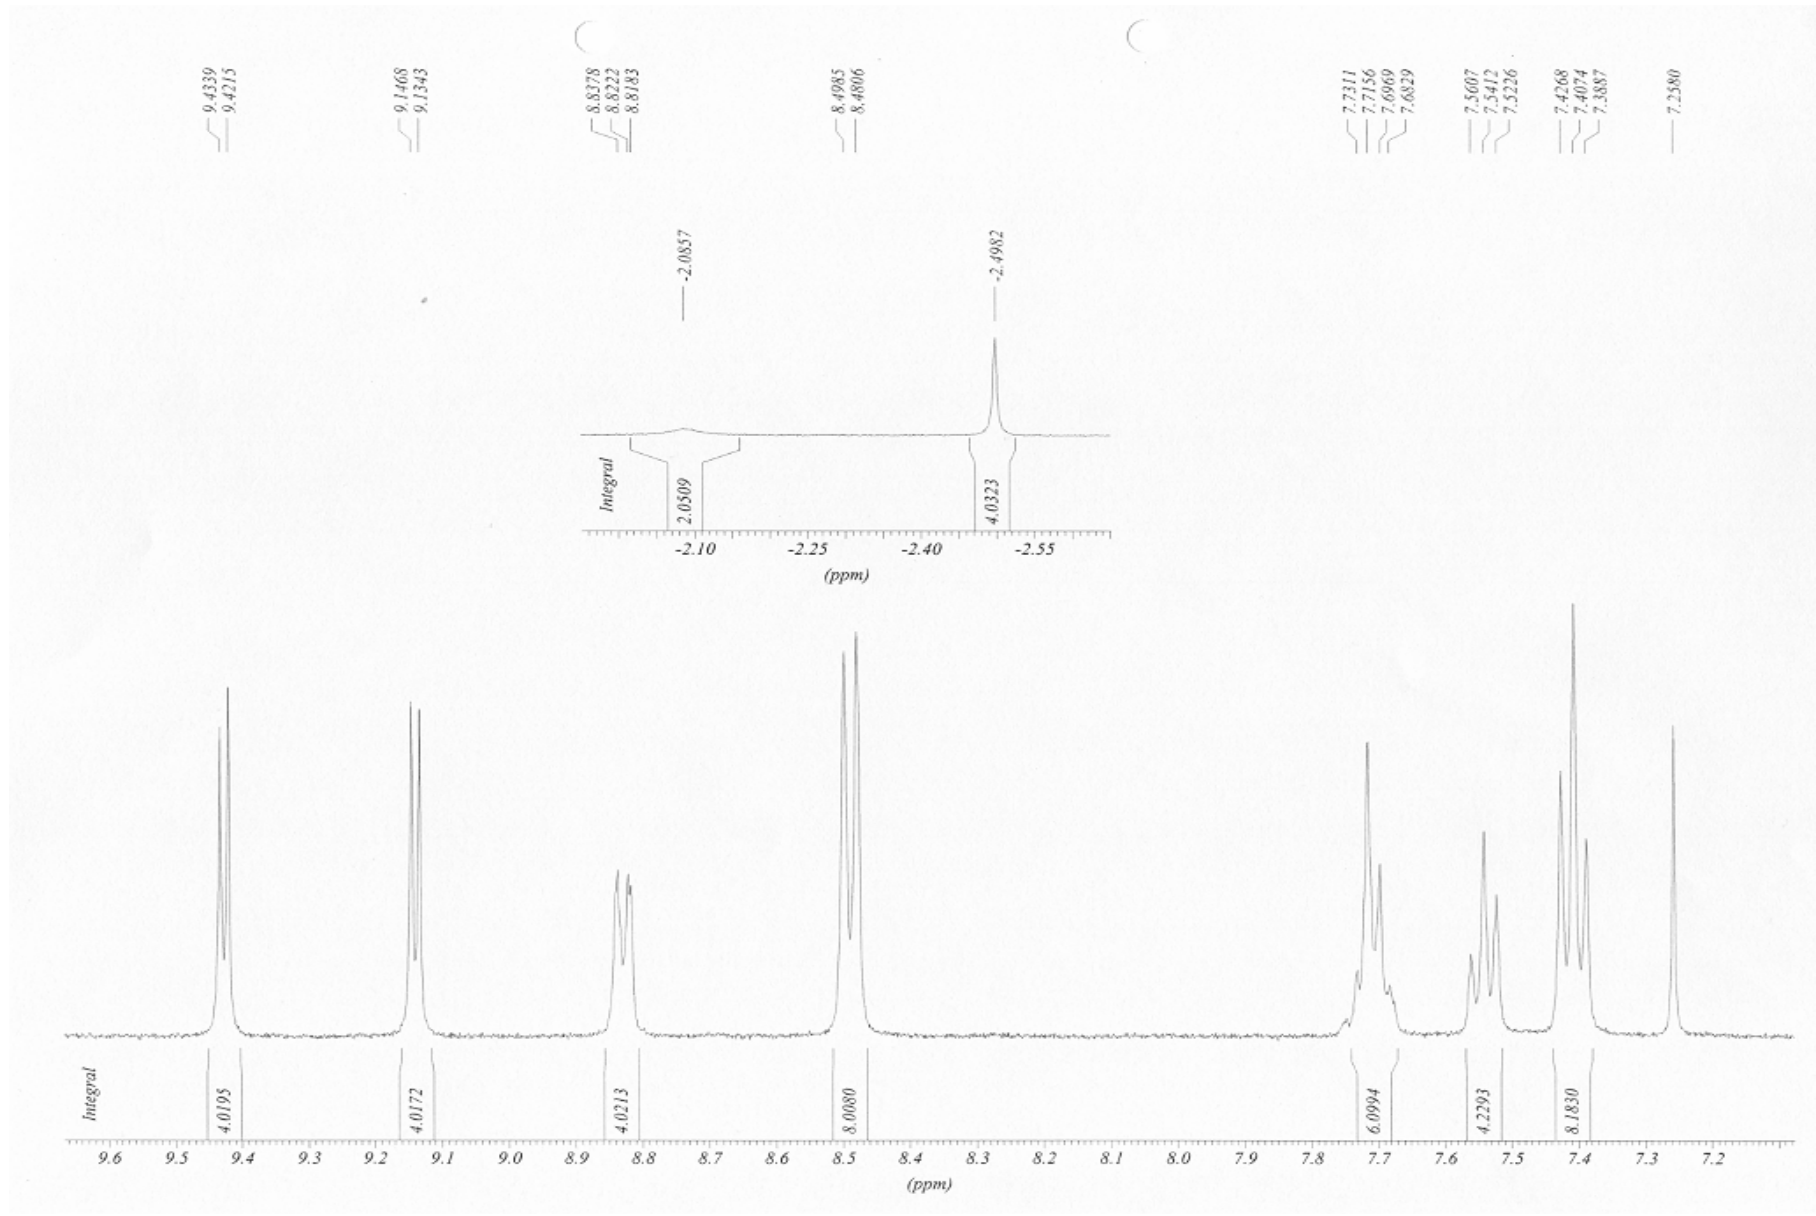

<sup>13</sup>C NMR

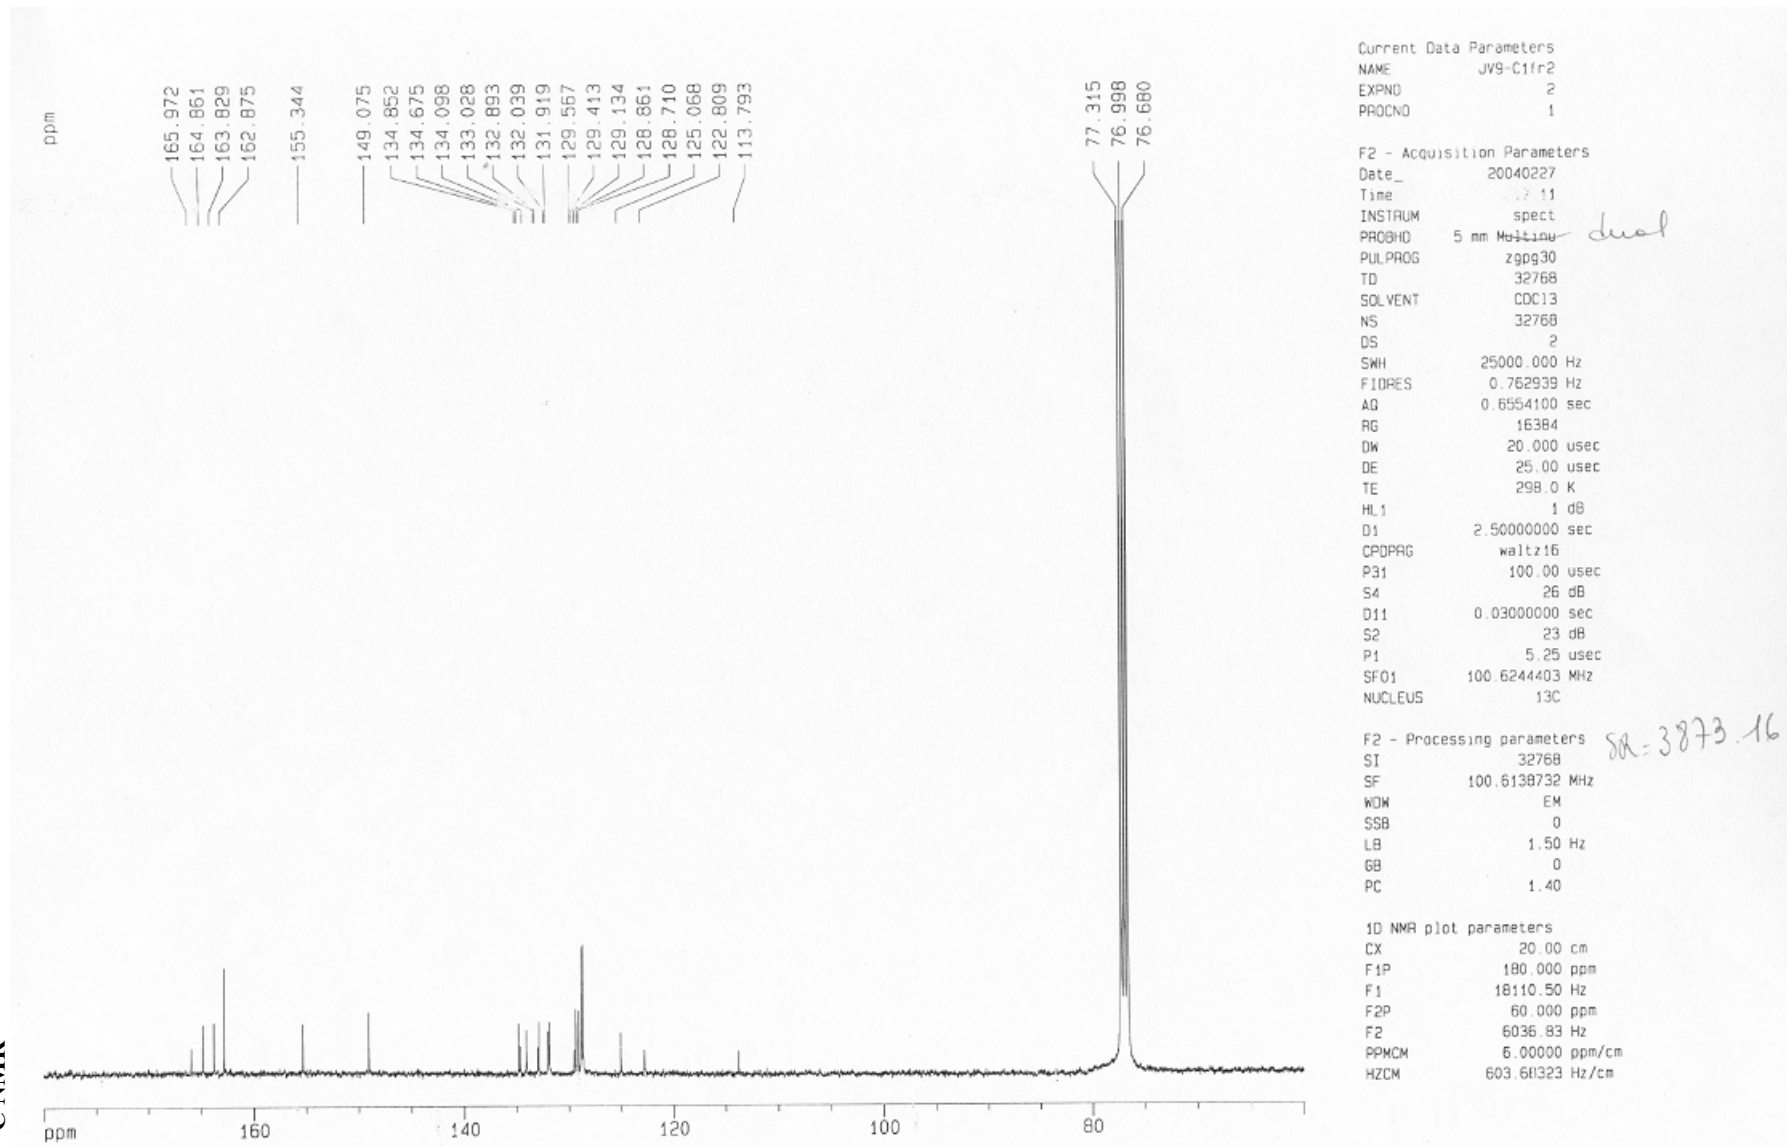

- HMQC

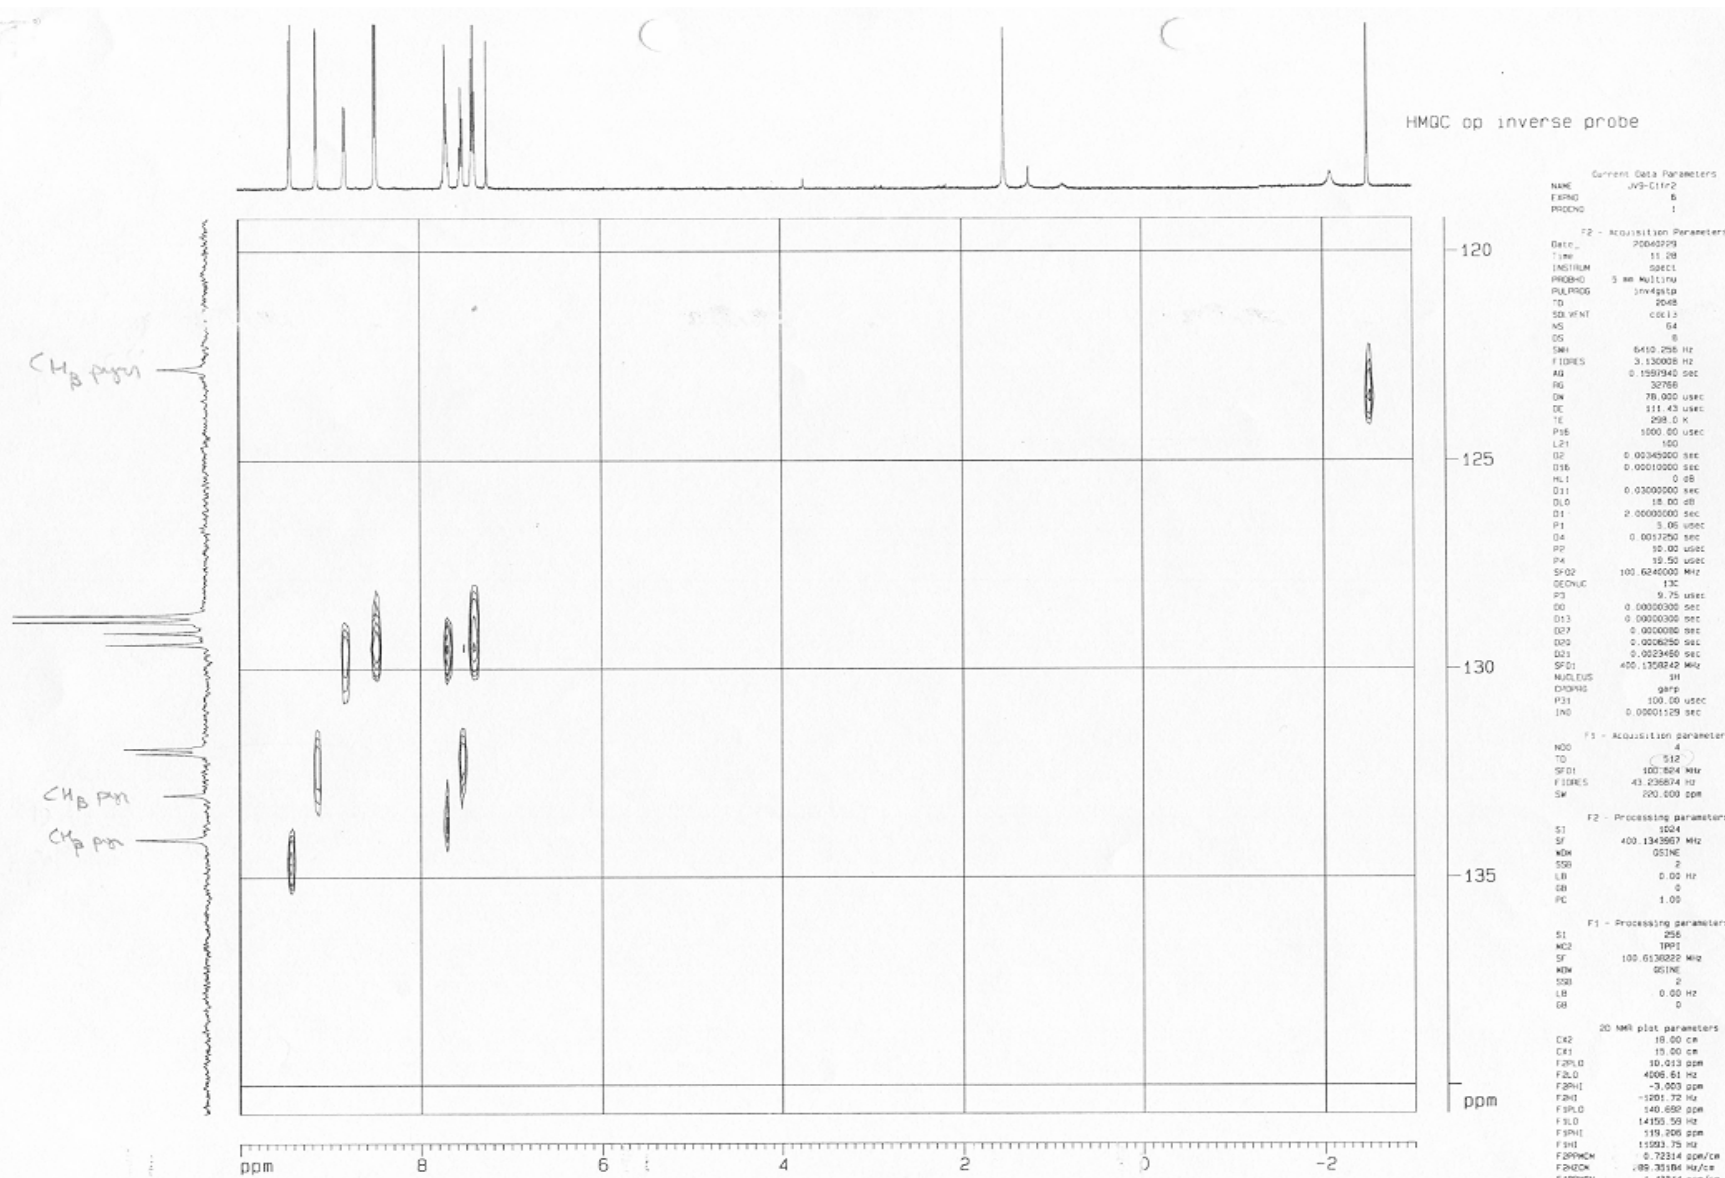



- HMBC

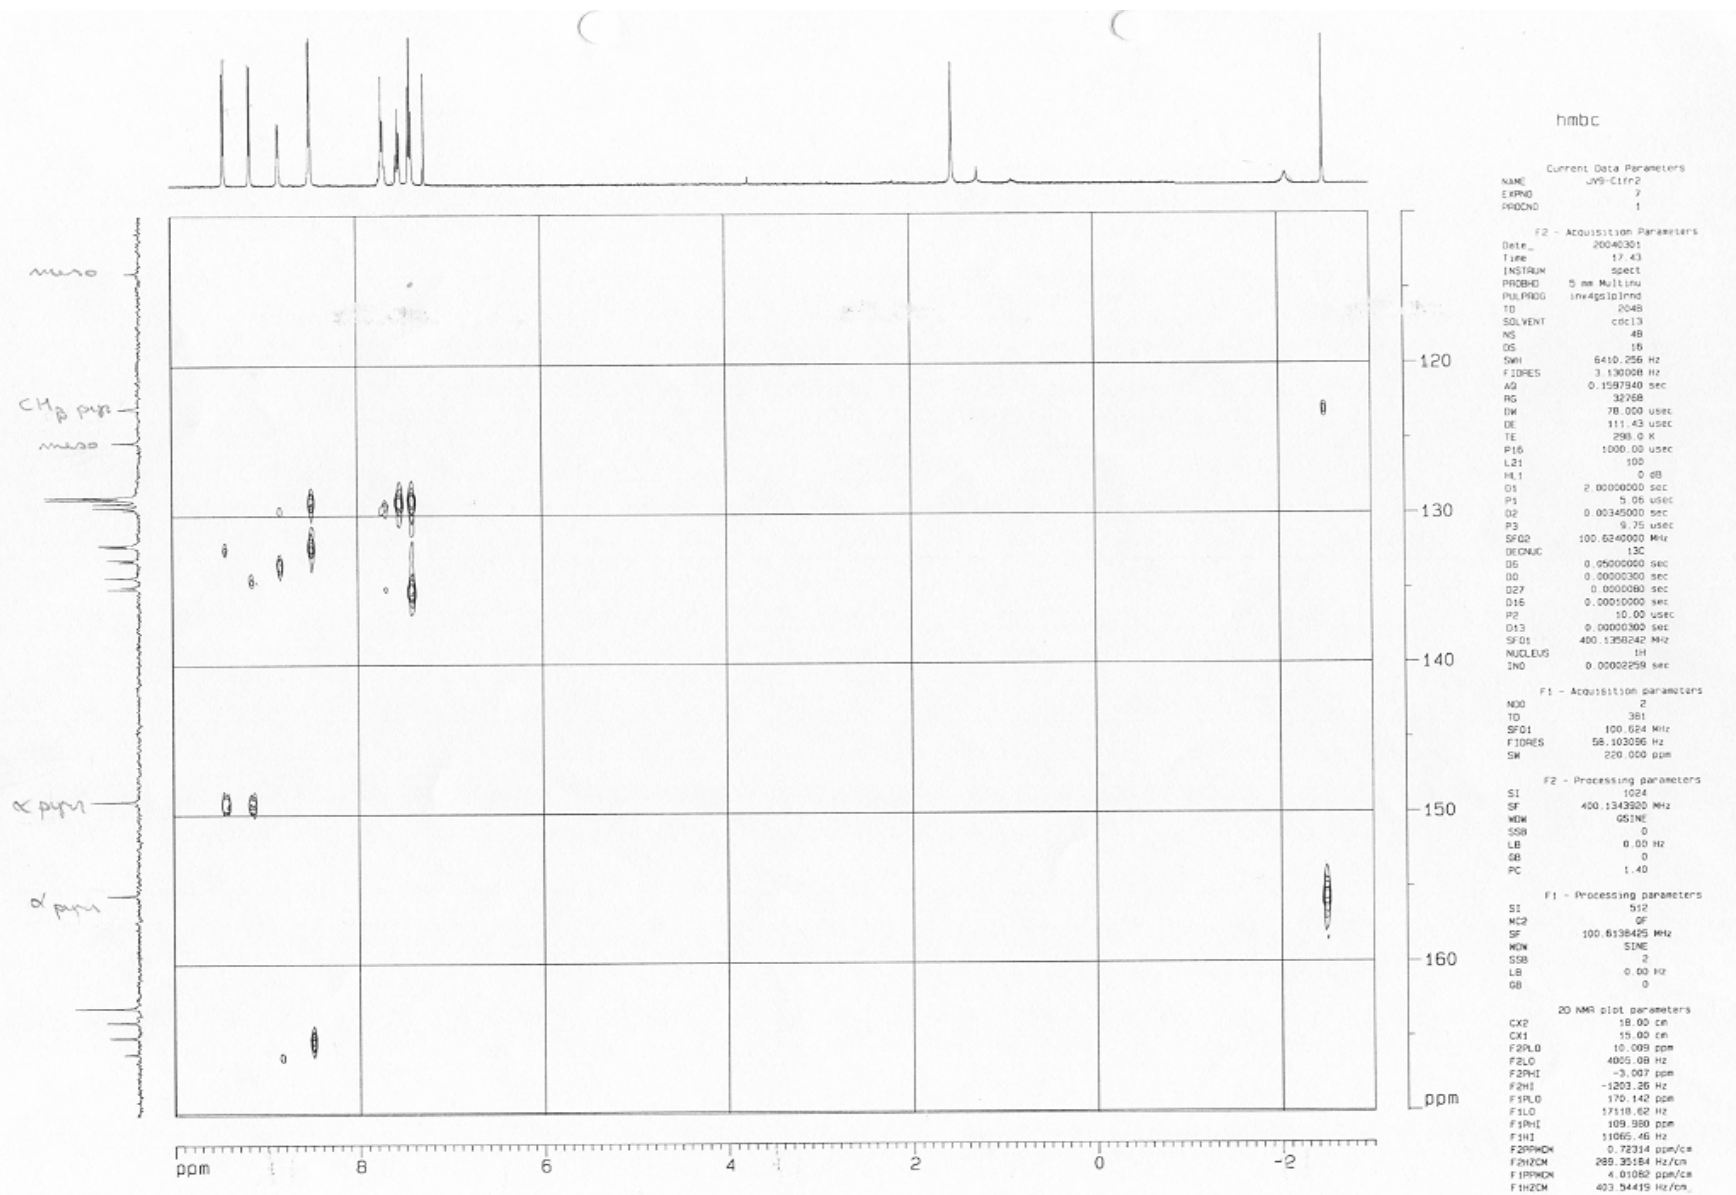



\* *syn*-Doubly N-fused hexaphyrin 6

- ESI-MS

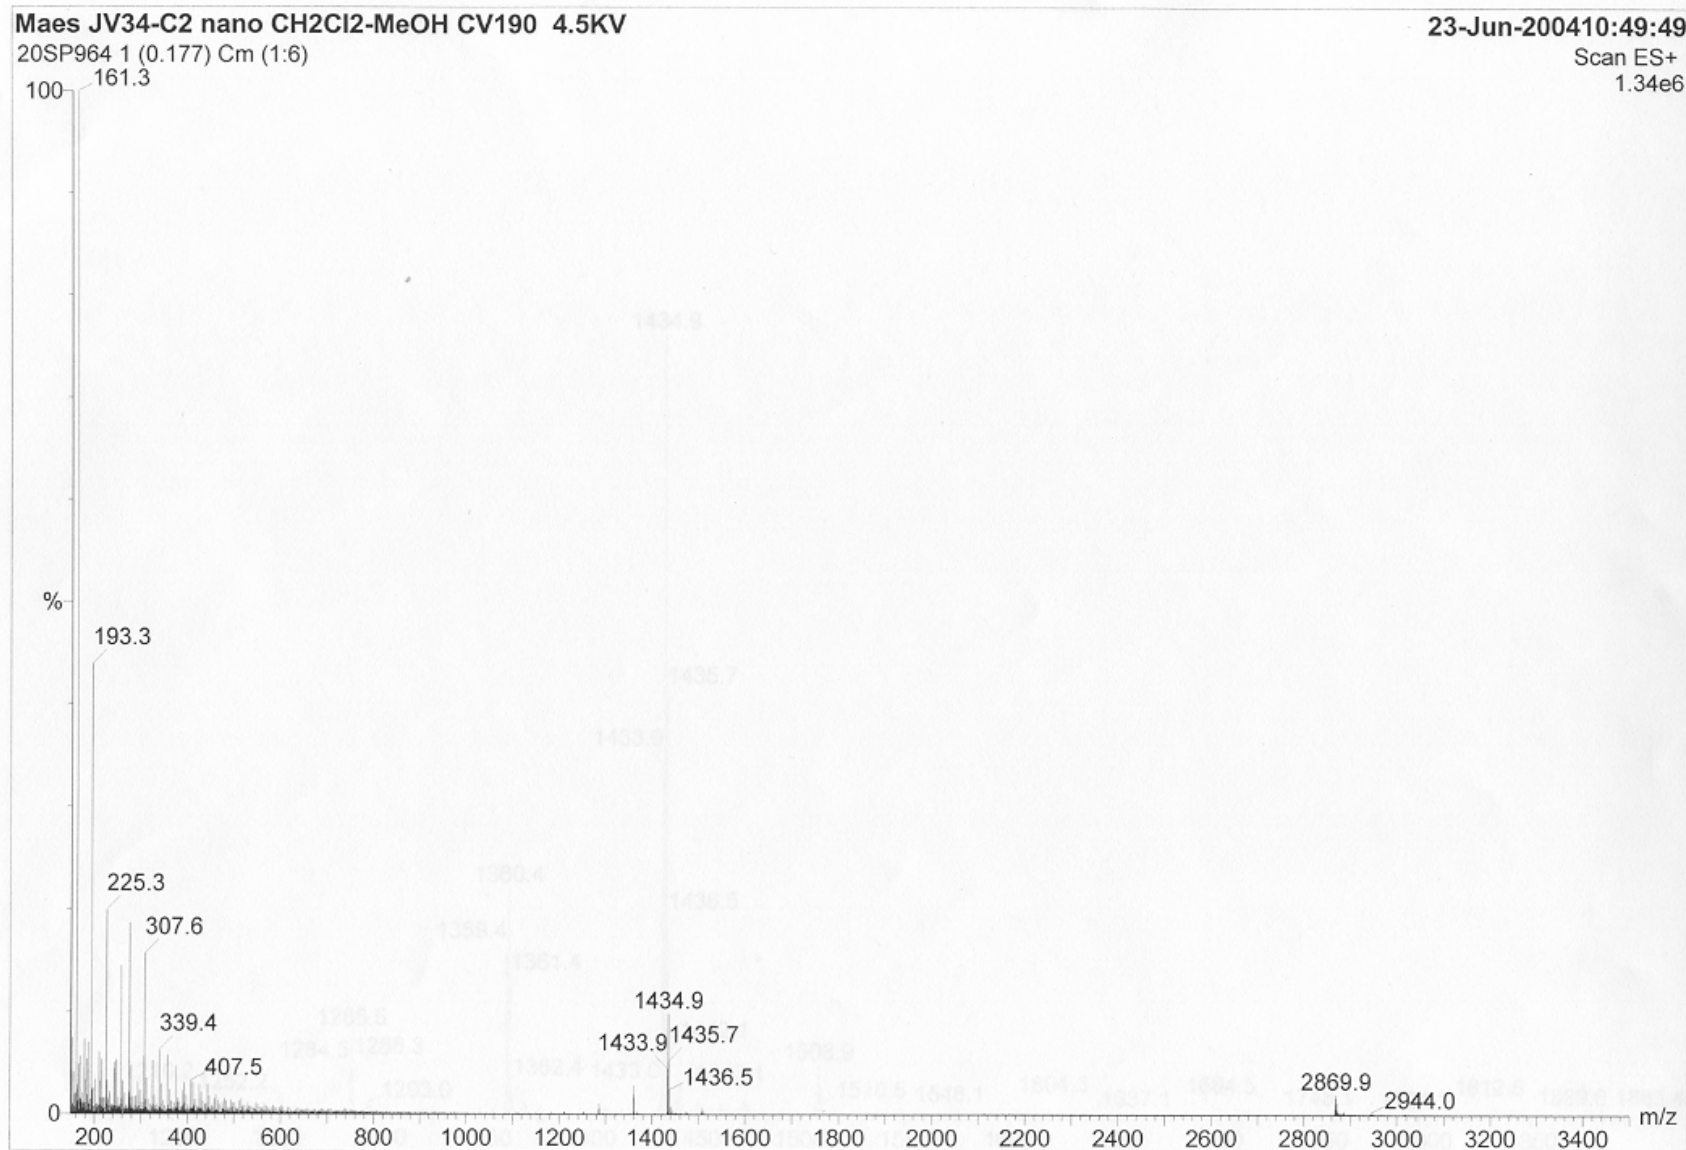

# Supplementary Material (ESI) for Chemical Communications  
# This journal is © The Royal Society of Chemistry 2005

- <sup>1</sup>H NMR

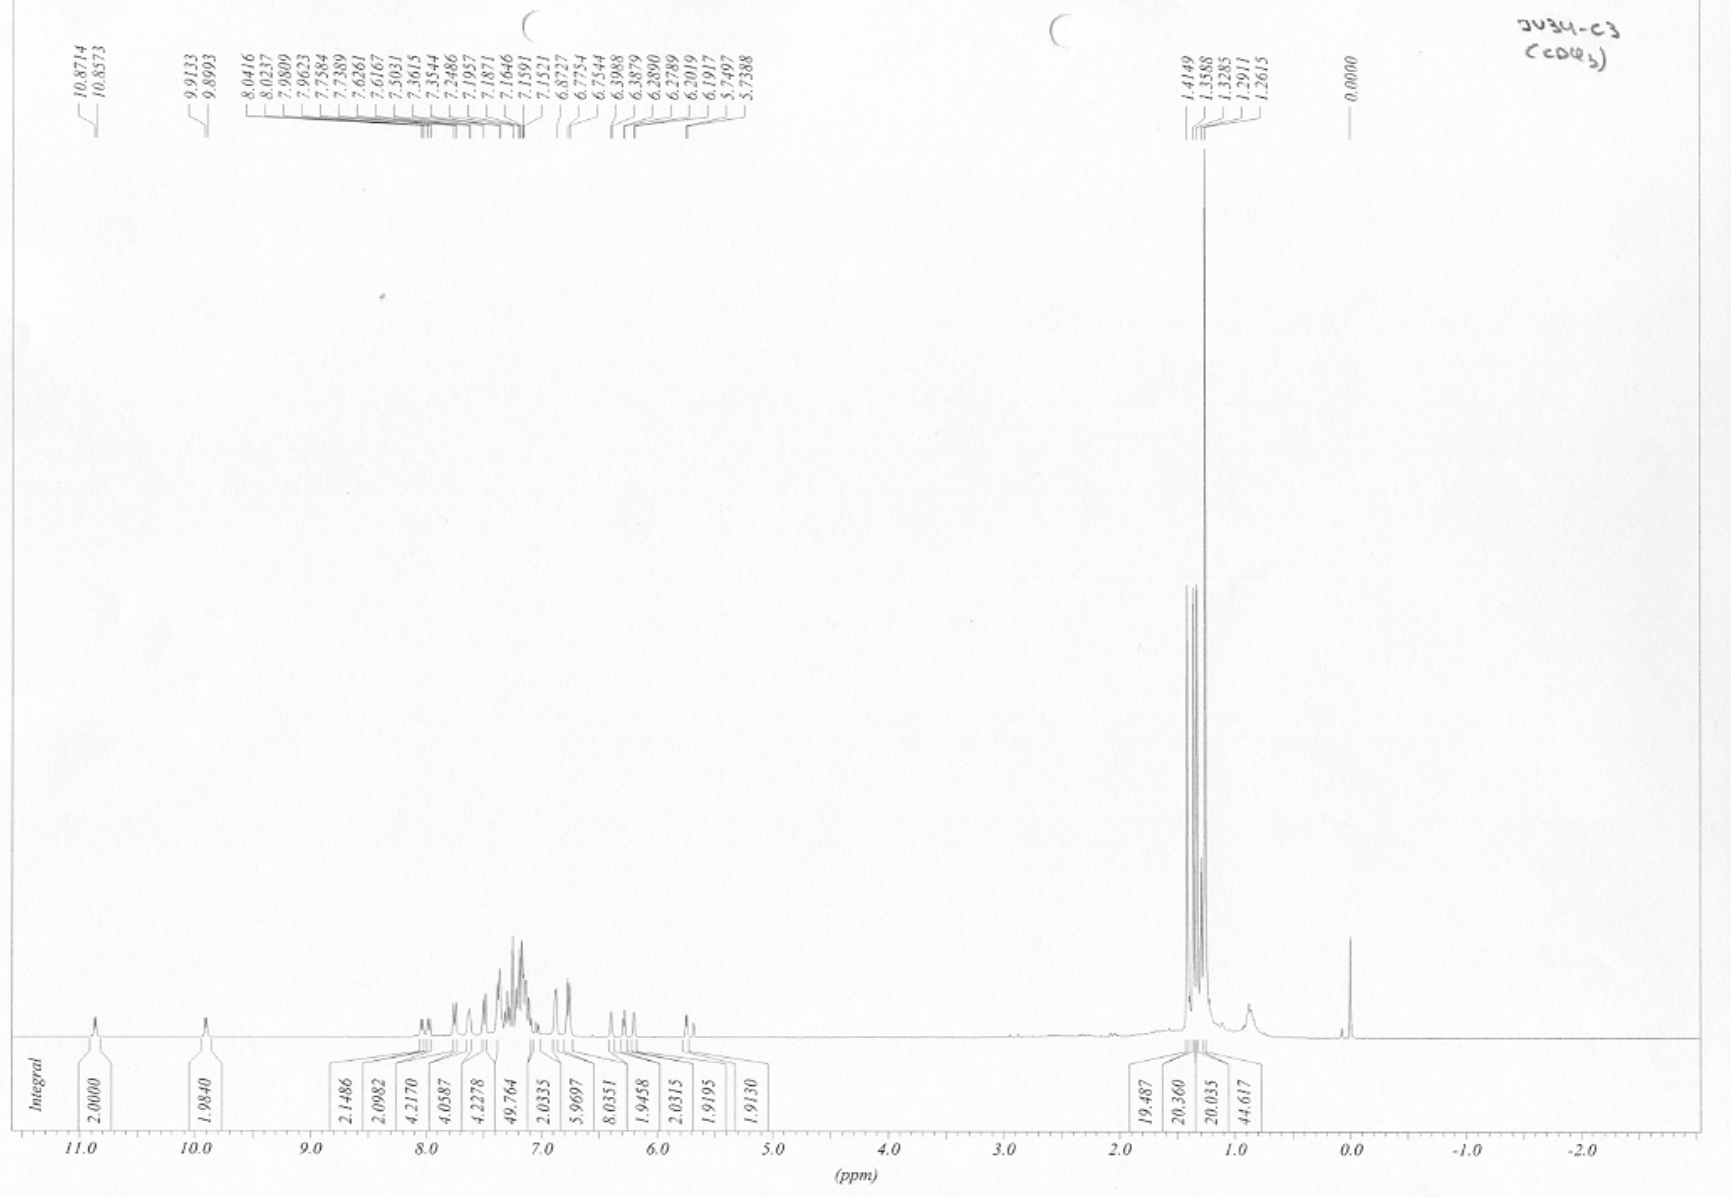

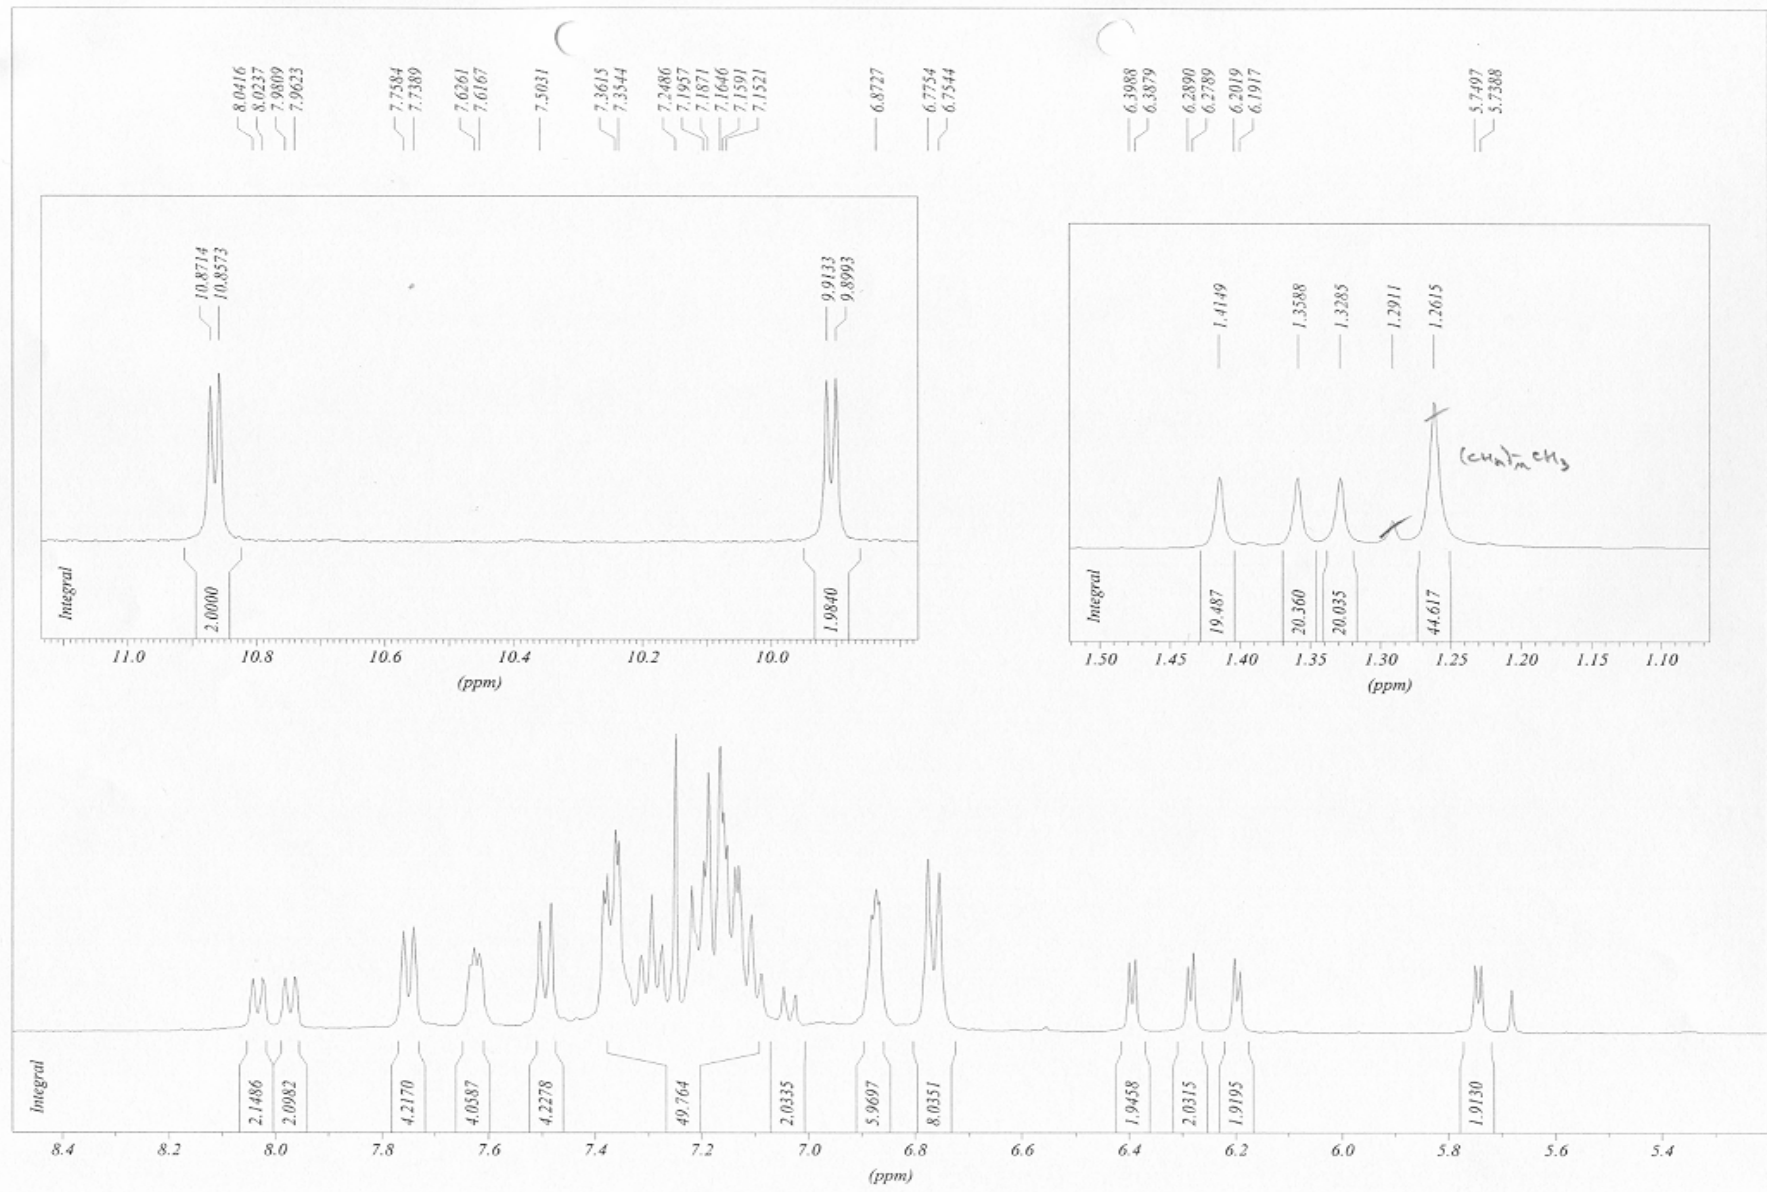

<sup>13</sup>C NMR

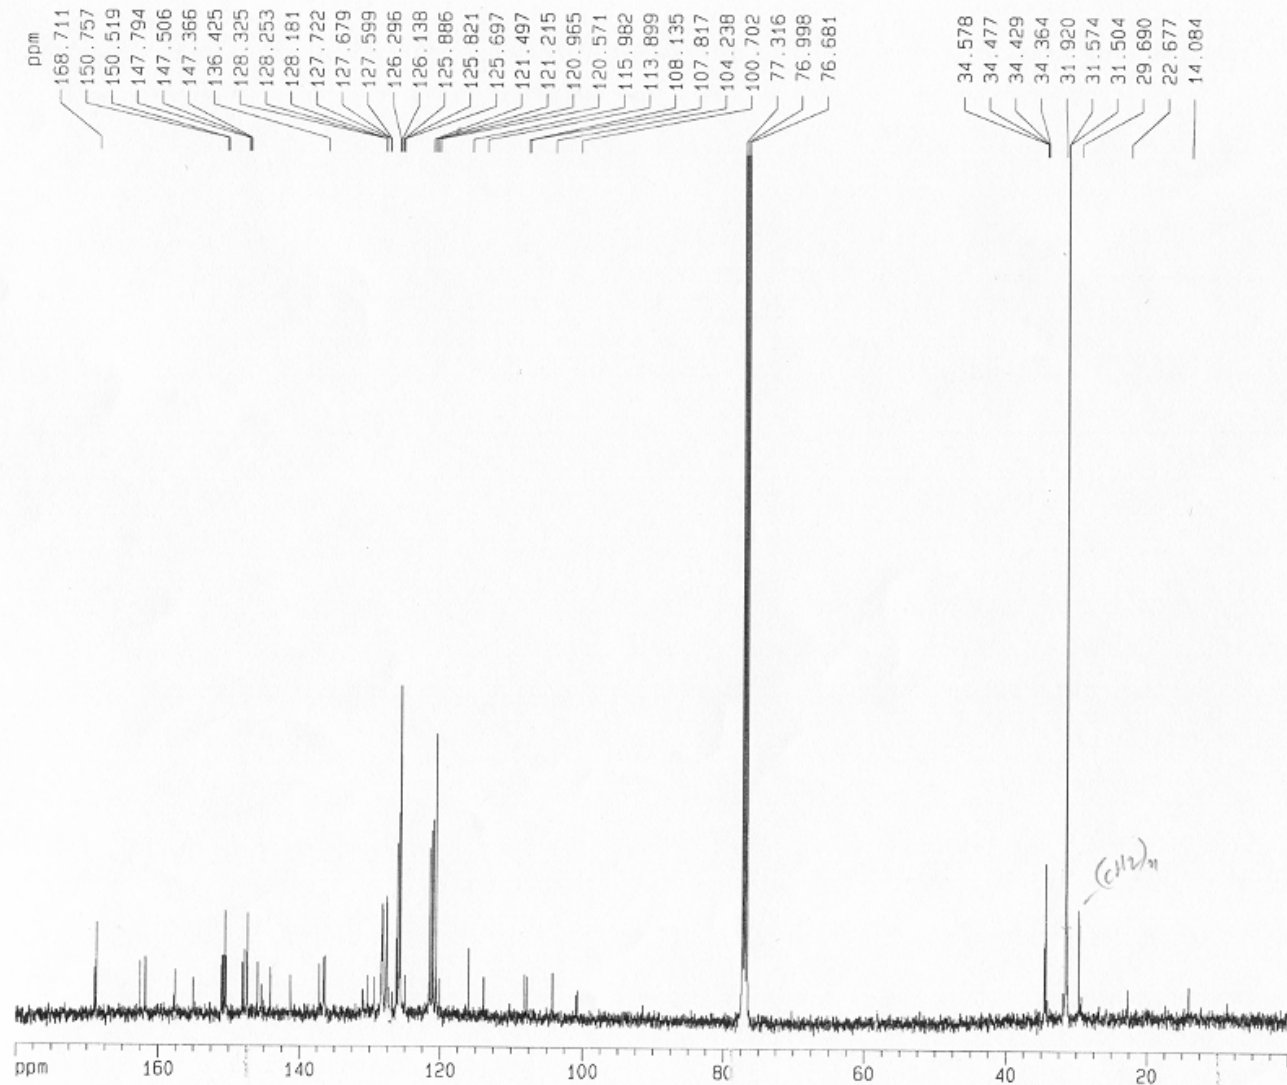

Current Data Parameters  
 NAME JV34C3-clofilil  
 EXPNO 2  
 PROCNO 1

F2 - Acquisition Parameters  
 Date\_ 20040914  
 Time 18.40  
 INSTRUM spect  
 PROBHD 5 mm Multinu  
 PULPROG zgpg30  
 TD 32768  
 SOLVENT CDCl3  
 NS 24576  
 DS 2  
 SWH 25000.000 Hz  
 FIDRES 0.762939 Hz  
 AQ 0.6554100 sec  
 RG 16384  
 DW 20.000 usec  
 DE 25.00 usec  
 TE 298.0 K  
 HL1 -1 dB  
 D1 1.00000000 sec  
 CPDPRG waltz16  
 P31 100.00 usec  
 S4 35 dB  
 D11 0.03000000 sec  
 S2 32 dB  
 P1 11.00 usec  
 SF01 100.6244403 MHz  
 NUCLEUS 13C

F2 - Processing parameters  
 SI 32768  
 SF 100.6138716 MHz  
 WDW EM  
 SSB 0  
 LB 1.50 Hz  
 GB 0  
 PC 1.40

1D NMR plot parameters  
 CX 20.00 cm  
 F1P 180.000 ppm  
 F1 18110.50 Hz  
 F2P 0.000 ppm  
 F2 0.00 Hz  
 PPMCM 9.00000 ppm/cm  
 HZCM 905.52484 Hz/cm

*SR = 3871.64*

\* *anti*-Doubly N-fused hexaphyrin 7

- ESI-MS

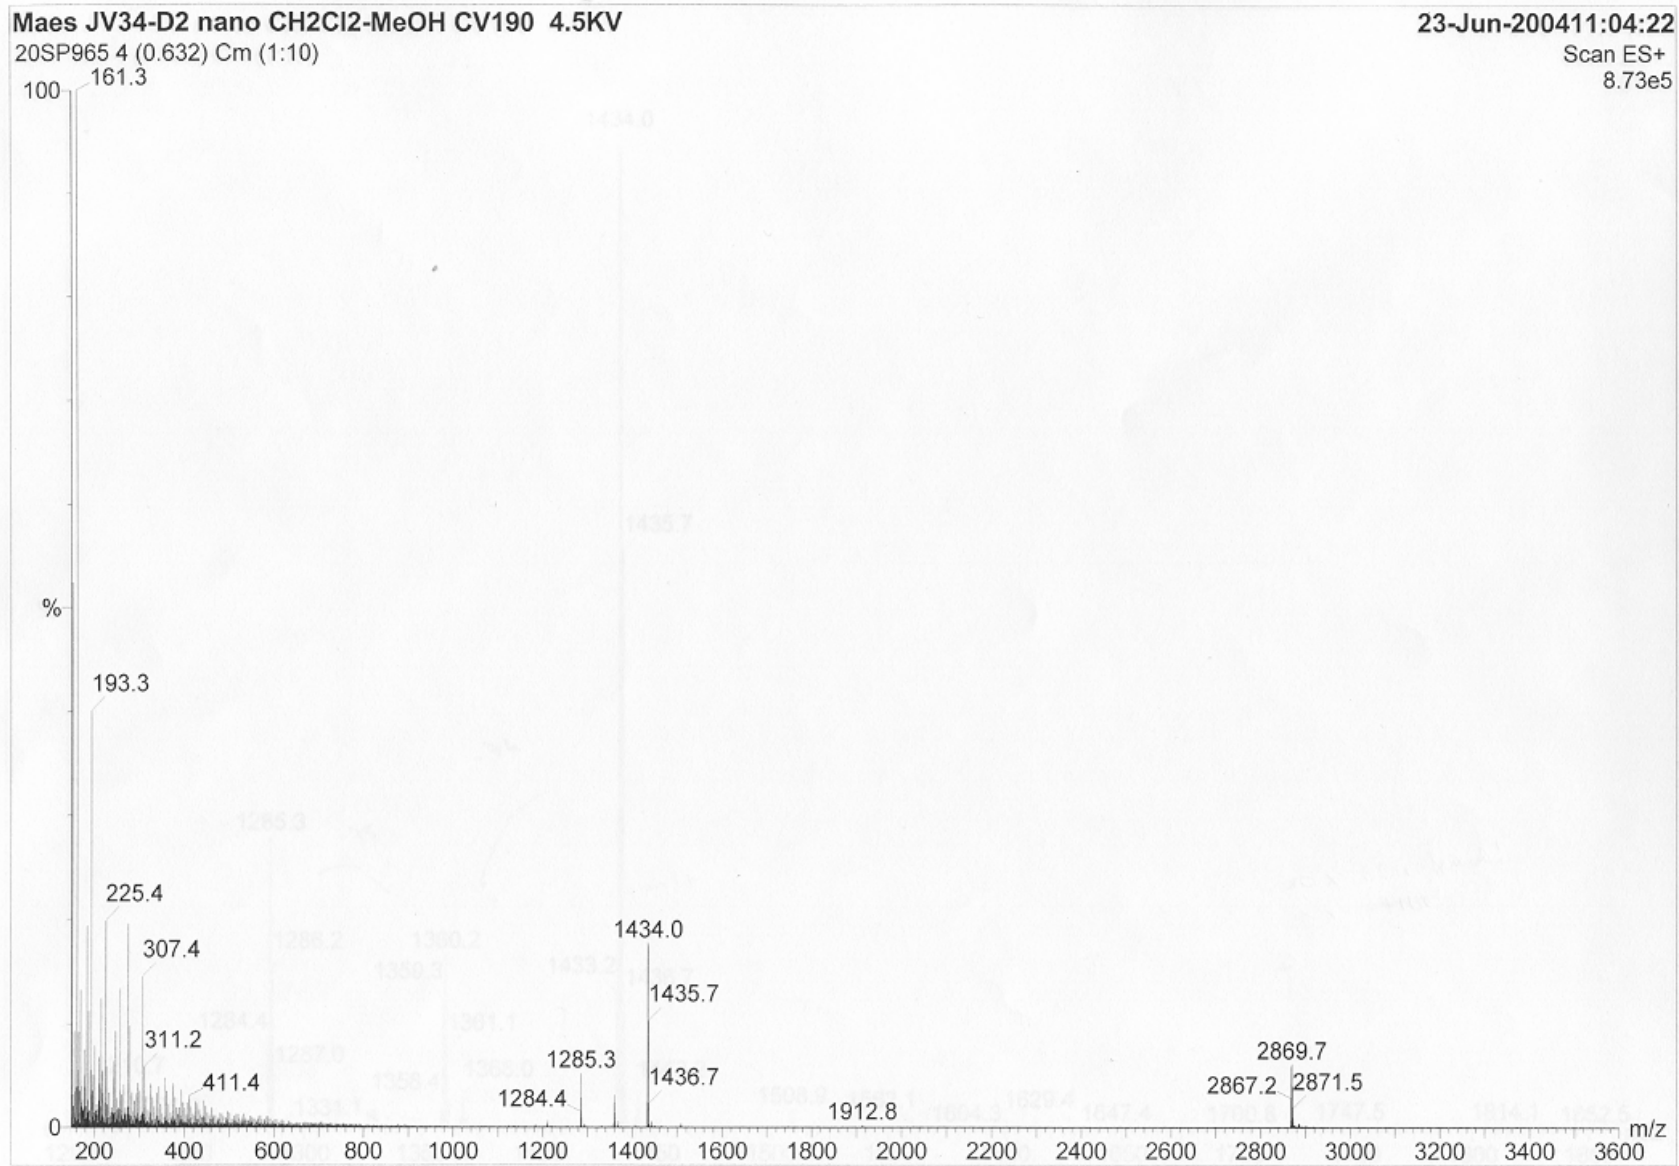

<sup>1</sup>H NMR

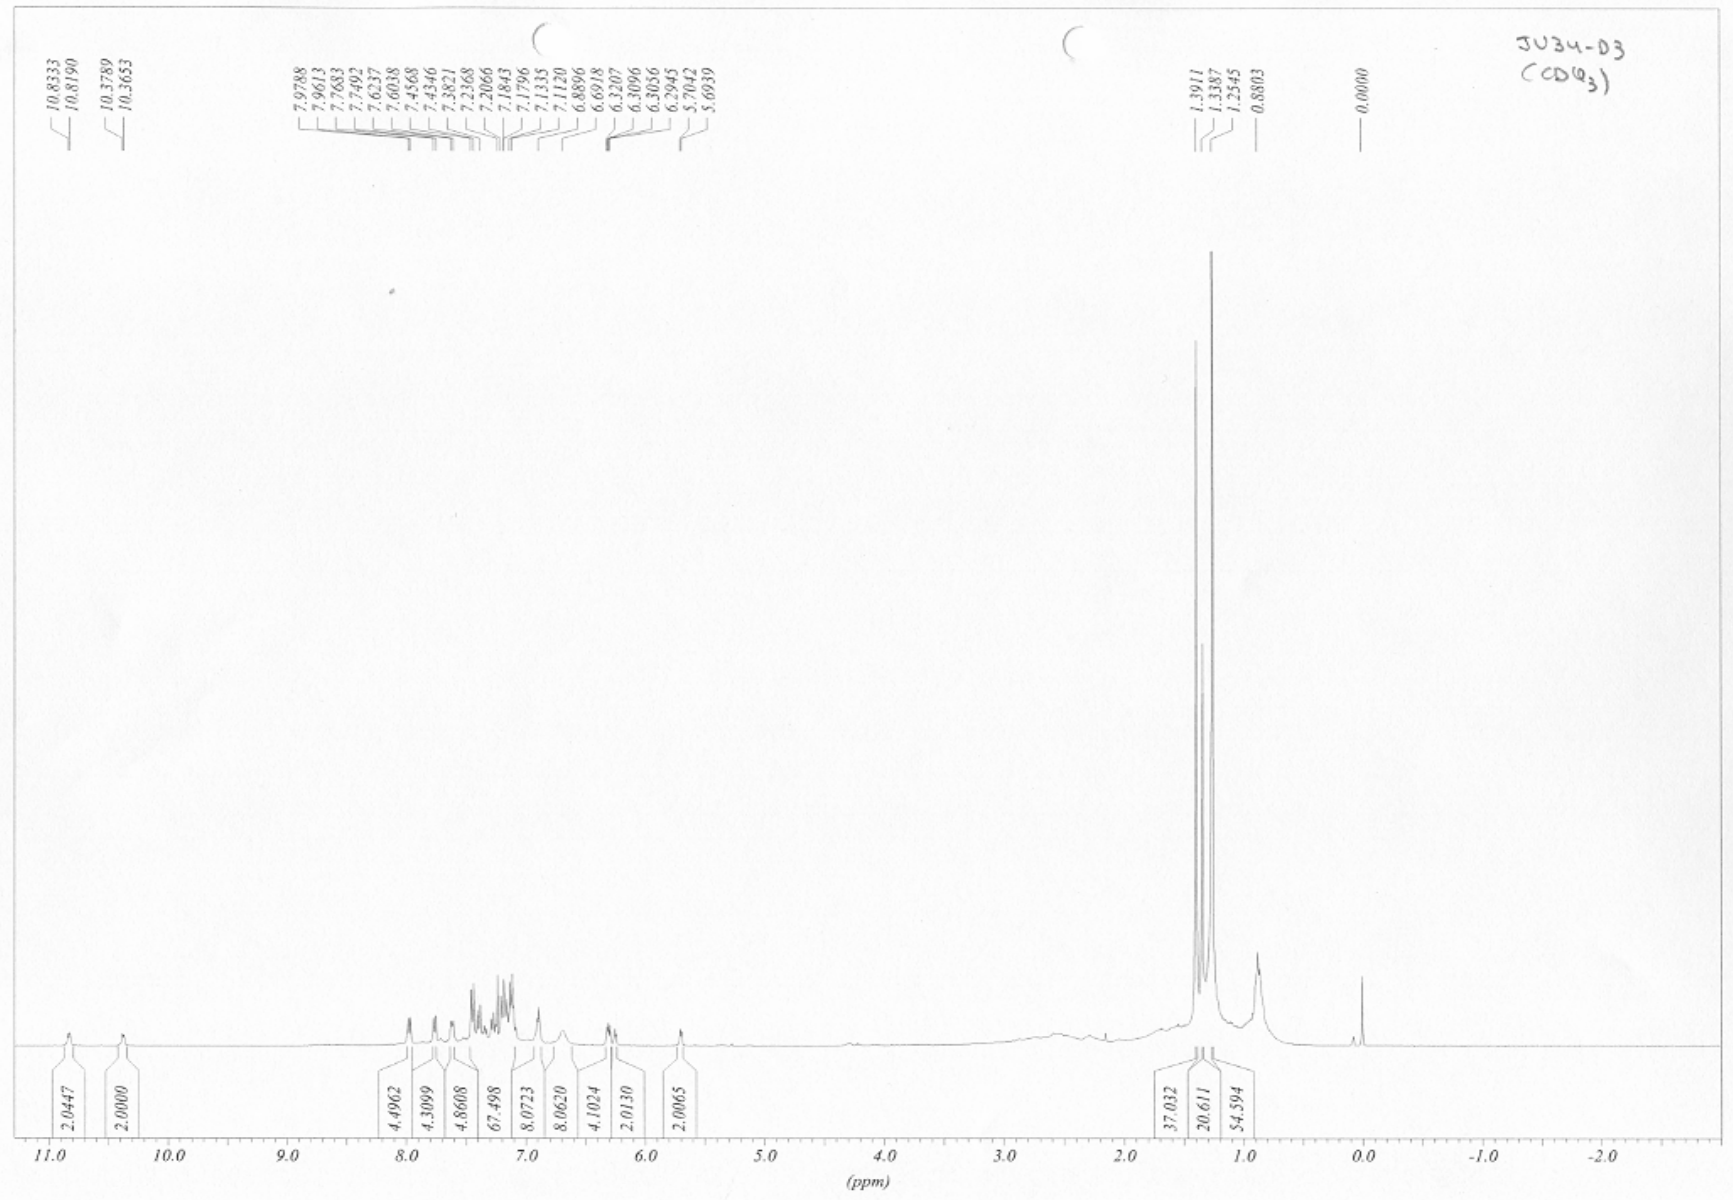



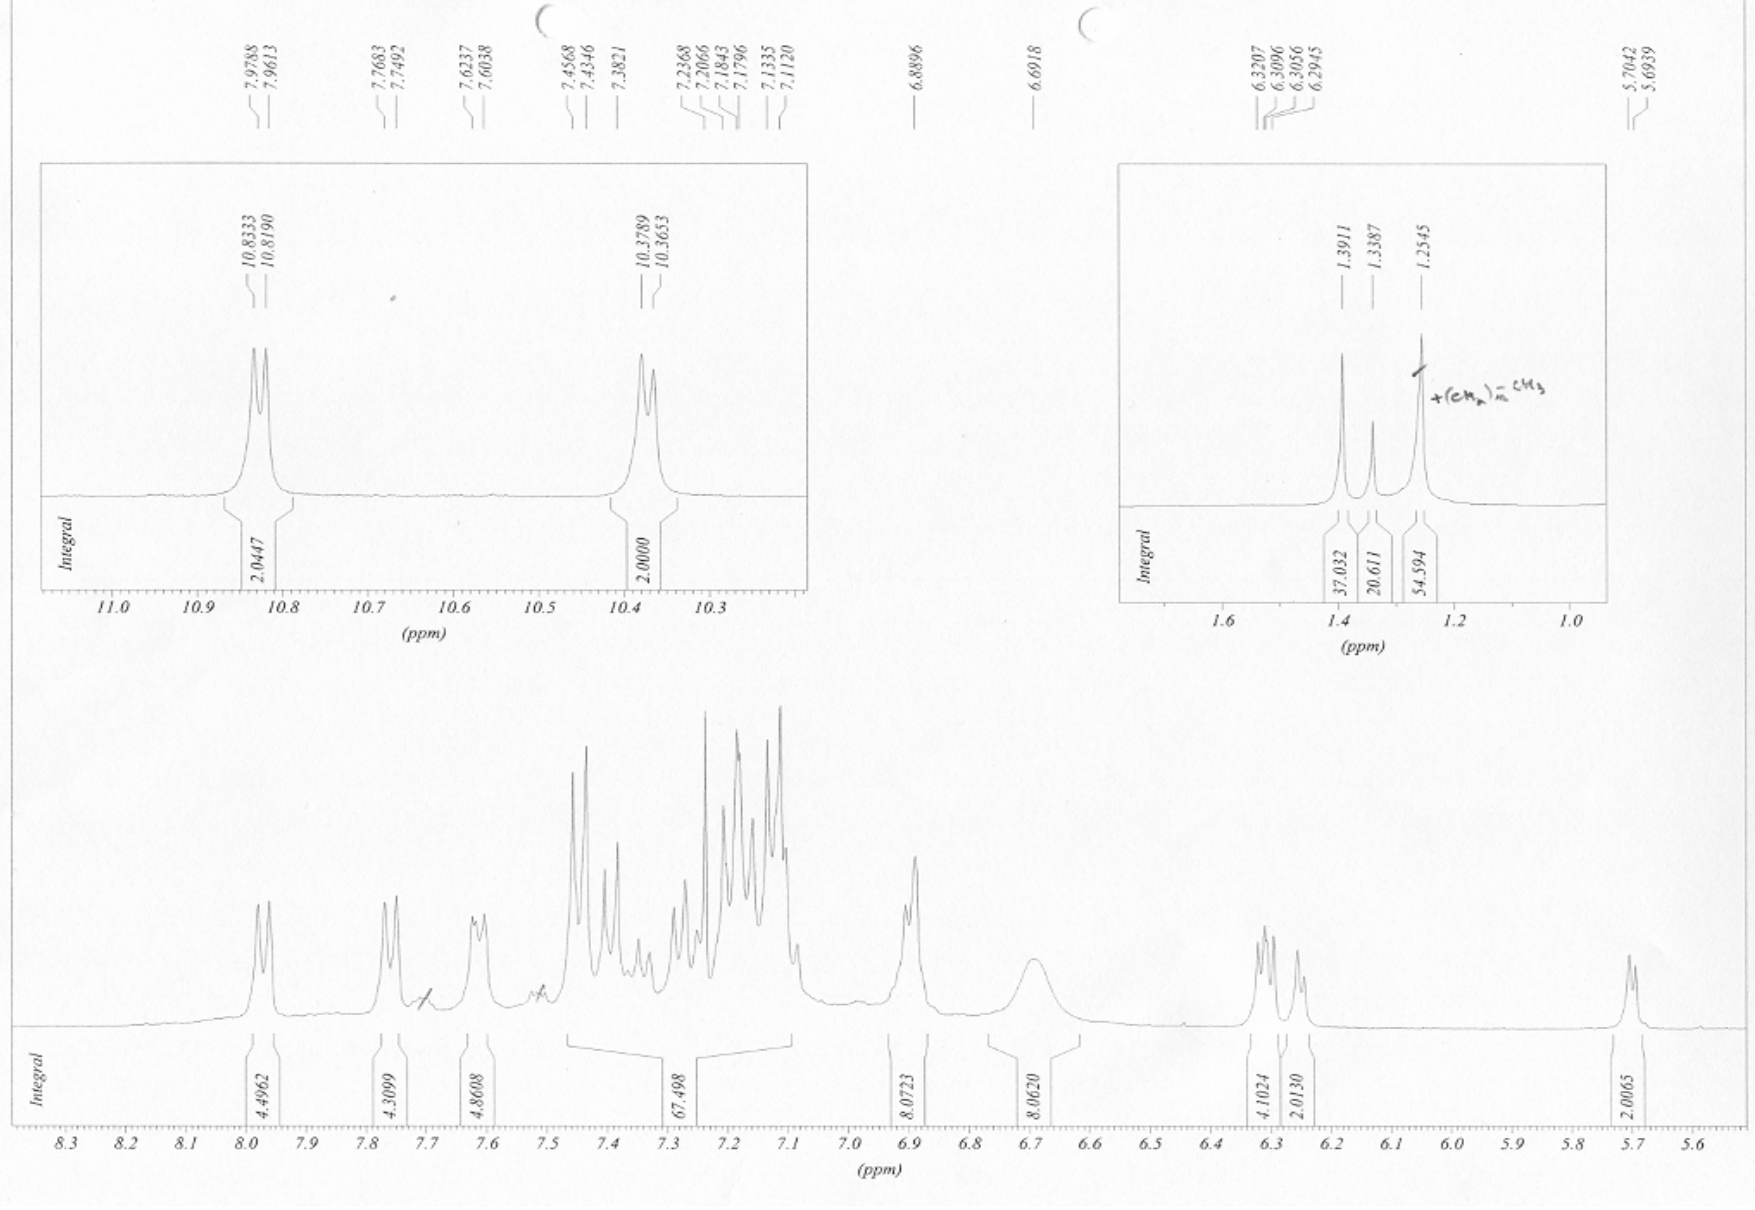



<sup>13</sup>C NMR

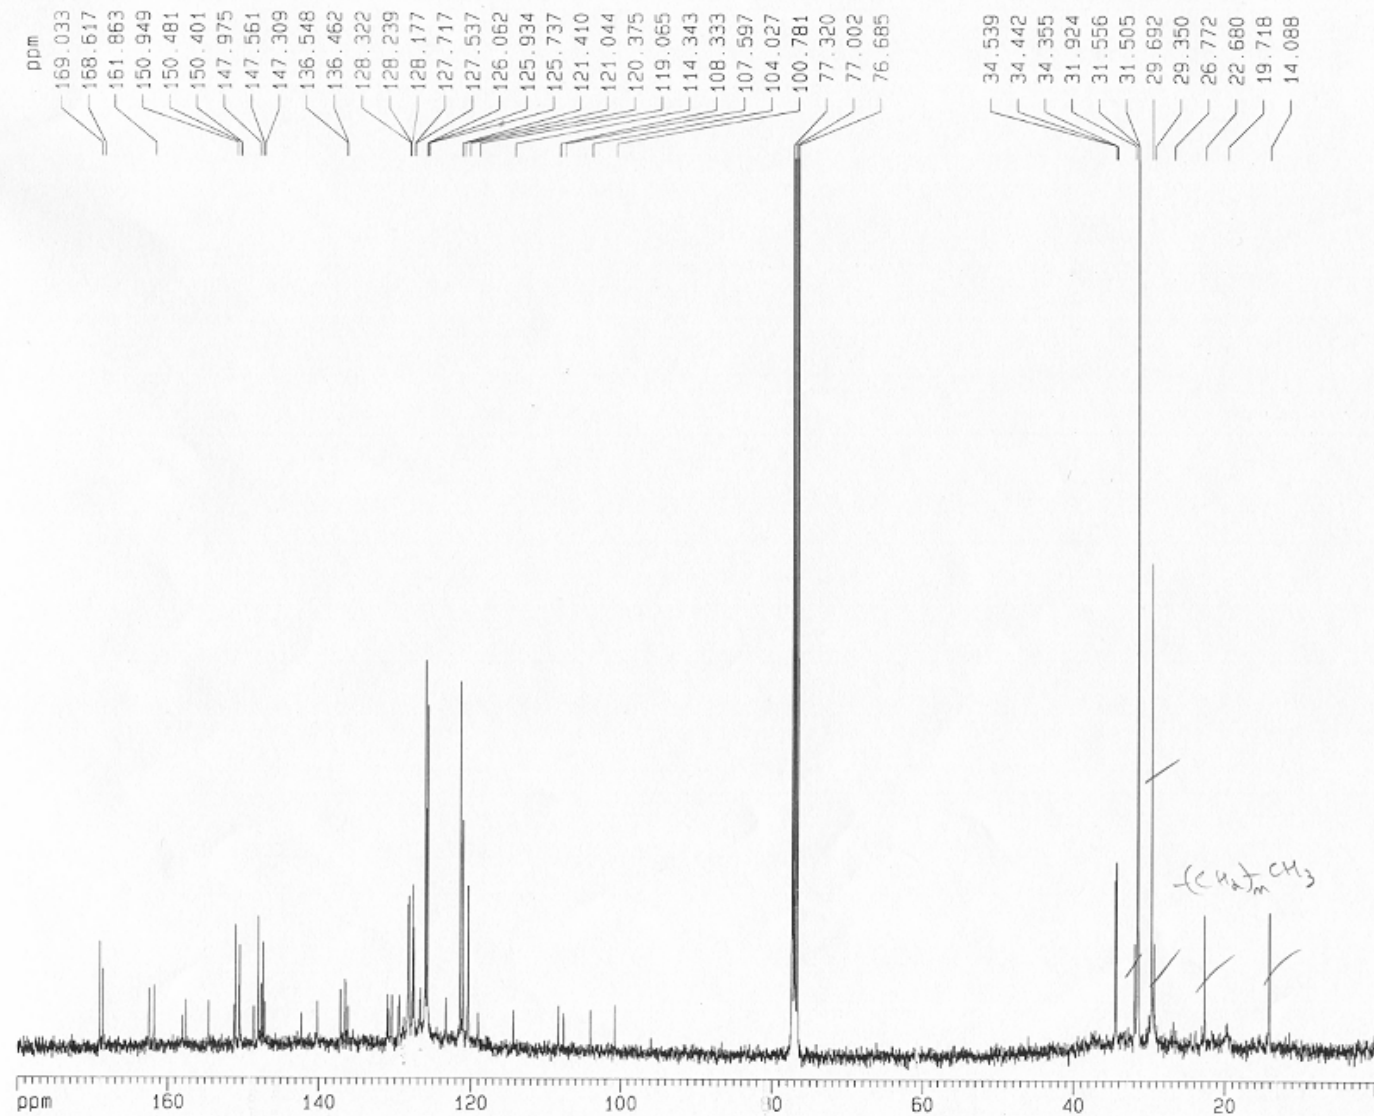

Current Data Parameters  
 NAME JV3403-clofillt  
 EXPNO 2  
 PROCNO 1

F2 - Acquisition Parameters  
 Date\_ 20040921  
 Time 17.57  
 INSTRUM spect  
 PROBHD 5 mm Multinu  
 PULPROG zgpg30  
 TD 32768  
 SOLVENT CDC13  
 NS 24576  
 DS 2  
 SWH 25000.000 Hz  
 FIDRES 0.762939 Hz  
 AQ 0.6554100 sec  
 RG 16384  
 DW 20.000 usec  
 DE 25.00 usec  
 TE 298.0 K  
 HL1 1 dB  
 D1 1.00000000 sec  
 CPDPRG waltz16  
 P31 100.00 usec  
 S4 35 dB  
 D11 0.03000000 sec  
 S2 32 dB  
 P1 11.00 usec  
 SF01 100.6244403 MHz  
 NUCLEUS 13C

F2 - Processing parameters  
 S1 32768  
 SF 100.6138724 MHz  
 WDW EM  
 SSB 0  
 LB 1.50 Hz  
 GB 0  
 PC 1.40

1D NMR plot parameters  
 CX 20.00 cm  
 F1P 180.000 ppm  
 F1 18110.50 Hz  
 F2P 0.000 ppm  
 F2 0.00 Hz  
 PPMCM 9.00000 ppm/cm  
 HZCM 905.52484 Hz/cm
